# Supplementary material for: Cleaner wrasse Labroides dimidiatus perform above chance in a “matching-to-sample” experiment
Source: PubMed Central journal article supplement (PMC8803161; doi:10.1371/journal.pone.0262351), 2022-01-31
Supplement: pone.0262351.s003.pdf [file pone.0262351.s003.pdf]

| Reference                                                   | Species (n)      | Task                        | Stimuli | Pre-training and/or training                                                                                                                 | N° training trials            | Transfer test                                                                                  | N° transfer trials                     | Success/fail  |
|-------------------------------------------------------------|------------------|-----------------------------|---------|----------------------------------------------------------------------------------------------------------------------------------------------|-------------------------------|------------------------------------------------------------------------------------------------|----------------------------------------|---------------|
| <b>Finch, 1942</b><br><b>(by Oden et al., 1988)</b>         | Chimpanzee (4)   | MTS                         | ?       | two training stimuli                                                                                                                         | 600 – 1,000                   | new stimuli                                                                                    | similar to Oden et al, 1988: 24 trials | success       |
| <b>Nissen et al., 1948</b><br><b>(by Oden et al., 1988)</b> | Chimpanzee (4)   | MTS                         | ?       | two training stimuli                                                                                                                         | 600 – 1,000                   | new stimuli                                                                                    | similar to Oden et al, 1988: 24 trials | success       |
| <b>Blough, 1959</b>                                         | Pigeons (4)      | MTS                         | light   | two training stimuli<br>steady light / flicker light                                                                                         | 500 – 1,000                   | new stimuli<br>(for 20 presentations)                                                          | 8000<br>90% correct                    | 2/4 succeeded |
| <b>Goldman and Shapiro, 1979</b>                            | Goldfish (5+5)   | simultaneous MTS<br>(n = 1) | light   | Pre-training: white light in the middle, white light both side, touch and receive food<br><br>Training: 3 stimuli: red, green and blue light | 300 – 500<br><br>8,400<br>60% | same stimuli                                                                                   | 8400<br>60%                            | success       |
| <b>Zerbolio et Royalty, 1983</b>                            | Goldfish (24+24) | MTS<br>(n = 4)              | light   | 12 with red/green<br>12 with blue/yellow<br>30 days<br>40trials/day<br>5days/week                                                            | 840 on 1,200 trials total     | 2x 8 (n = 2) new stimuli<br>2x 8 (n = 2) same stimuli<br>30 days<br>40trials/day<br>5days/week | 600 on average                         | success       |

|                            |                      |       |               |                                                                                                                                                                         |                                                      |           |         |
|----------------------------|----------------------|-------|---------------|-------------------------------------------------------------------------------------------------------------------------------------------------------------------------|------------------------------------------------------|-----------|---------|
| <b>D'Amato et al, 1985</b> | Capuchin monkeys (8) | MTS   | symbol        | pre-training: sample - 1 stimulus showed                                                                                                                                | 3 visual stimuli: coloured disk red, yellow and blue | 240 - 624 | success |
|                            |                      |       |               | MTS training: simultaneous MTS procedure, only 2 stimuli used (shape)<br><br>criterion: 2x 90% on 2 successive blocks of 48 trials                                      |                                                      |           |         |
| <b>Wright et al, 1988</b>  | Pigeons (4)          | MTS   | symbol        | pre-training: 2 stimuli (arrow + apple)                                                                                                                                 |                                                      |           |         |
|                            |                      |       |               | training: 35 trials (1st session), grain placed on the correct comparison stimulus before the choice                                                                    |                                                      |           |         |
|                            |                      |       |               | Trial unique<br><br>152 different stimuli presented once daily<br><br>27,360<br><br>76 trials per day --> 75% over 360 training sessions (18 months; 360 presentations) |                                                      |           |         |
| 2 stimuli                  | train with 2 stimuli | 1,216 | Same as above | 7000                                                                                                                                                                    | fail                                                 |           |         |

|                            |                        |     |         |                                                                                                                                                                                                                                                                                                                                                                                                                  |                                       |                                                                                                                                                                                              |                                        |         |
|----------------------------|------------------------|-----|---------|------------------------------------------------------------------------------------------------------------------------------------------------------------------------------------------------------------------------------------------------------------------------------------------------------------------------------------------------------------------------------------------------------------------|---------------------------------------|----------------------------------------------------------------------------------------------------------------------------------------------------------------------------------------------|----------------------------------------|---------|
|                            |                        |     |         | 75% 16 sessions (1216 presentations)                                                                                                                                                                                                                                                                                                                                                                             |                                       |                                                                                                                                                                                              |                                        | (n = 2) |
|                            |                        |     |         | 76 trials                                                                                                                                                                                                                                                                                                                                                                                                        |                                       |                                                                                                                                                                                              |                                        |         |
|                            |                        |     |         | criteria: reach 75% or more -<br>-> tested to transfer                                                                                                                                                                                                                                                                                                                                                           |                                       |                                                                                                                                                                                              |                                        |         |
| <b>Oden et al., 1988</b>   | Infant chimpanzees (4) | MTS | objects | Pre-trained to handle 2 objects (cup and lock)<br><br>when putting an object into a baking tin rewarded via hugs and congratulations<br><br>training: give one object have to put it in a baking tin, then two alternative objects were placed 20cm apart and equidistant from the pan<br><br>session of 12-24 trials / ITI = mean of 30s / 1-3 times daily 5 times a week<br><br>criteria level: at least 10/12 | 642 – 1,000<br><br><br><br>816 (mean) | 2 new stimuli<br><br>session of 12 trials<br><br>reward with food and congratulations even when incorrect choice to keep them motivated<br><br>6 transfer tests so 12 novel objects in total | 24<br><br>mean % correct 67.7 - 85.4 % | success |
| <b>Herman et al., 1989</b> | Bottlenose dolphin (1) | MTS | objects | 4-5 stimuli<br><br>16-20 trials per session<br><br>2 sessions per day<br><br>simultaneous MTS as training: 72 trials over 6 days                                                                                                                                                                                                                                                                                 | 432<br><br>81%                        | Same stimuli<br><br>2-4 sessions for a total of 36-63 trials overall 83.3% correct<br><br>NO transfer trials                                                                                 | 564<br><br>83.3%                       | success |

|                            |                 |                  |                |                                                                                     |       |                                             |                                           |                           |
|----------------------------|-----------------|------------------|----------------|-------------------------------------------------------------------------------------|-------|---------------------------------------------|-------------------------------------------|---------------------------|
| <b>Pack et al, 1991</b>    | Sealion (1)     | generalized MTS  | symbol         | MTS training with 2 stimuli                                                         | 269   | Same stimuli                                | 72                                        | success                   |
|                            |                 |                  |                | 24 trials per session<br>criterion 2x 90% in a row                                  |       |                                             |                                           |                           |
|                            |                 |                  |                | with 3 stimuli                                                                      | 503   |                                             |                                           | criterion 2x 90% in a row |
| <b>Iversen, 1993</b>       | Rats (3)        | MTS              | light          | pre-training: steady / blinking                                                     | 200   | Same stimuli                                | 1000 – 1500                               | success                   |
|                            |                 |                  |                | sample in the middle, rat press it, stimulus (same) on one of the side, press, food |       |                                             |                                           |                           |
|                            |                 |                  |                | 2x 100 trials                                                                       |       |                                             |                                           |                           |
|                            |                 |                  |                | MTS training: simultaneous MTS / same stimuli as in pre-training                    | 5,000 | NO transfer trials                          |                                           |                           |
|                            |                 |                  |                | 1 session = 100 trials + number of repeated trial                                   |       |                                             |                                           |                           |
| <b>Giurfa et al, 2001</b>  | Honeybees (360) | MTS              | Colour         | 2 stimuli (colour)                                                                  | 60    | 2 new stimuli (grating)                     | 60                                        | success                   |
|                            |                 |                  | grating        | Y-maze, entrance encountered sample stimulus                                        |       |                                             |                                           |                           |
|                            |                 |                  |                | then stimuli A and B have to choose in decision chamber                             |       |                                             |                                           |                           |
| <b>Bodily et al., 2008</b> | Pigeons (5)     | simultaneous MTS | cartoon images | 3 pre-training stimuli                                                              | 2,352 | transfer trial with novel stimuli each time | 384                                       | success                   |
|                            |                 |                  | computer       | 84 trials/session                                                                   |       |                                             | 4 consecutive transfer sessions conducted |                           |

|                                 |                      |                  |        |                                                                                          |           |                                            |                                  |         |
|---------------------------------|----------------------|------------------|--------|------------------------------------------------------------------------------------------|-----------|--------------------------------------------|----------------------------------|---------|
|                                 |                      |                  |        | 3 same stimuli as pre-training                                                           | 672       | 48 novel pairs                             |                                  |         |
|                                 |                      |                  |        | training: 96 trials/day                                                                  |           |                                            |                                  |         |
|                                 |                      |                  |        | 12 combinations configuration                                                            |           |                                            |                                  |         |
|                                 |                      |                  |        | >85% correct on 2 consecutive sessions with CP --> without CP: >85% correct in 1 session |           |                                            |                                  |         |
| <b>Truppa et al., 2010</b>      | Capuchin monkeys (6) | Simultaneous MTS | symbol | 2 stimuli used                                                                           | 10,852    | 10 transfer tests composed of 4 sessions   | 1812 - 48 (decreasing over test) | success |
|                                 |                      |                  |        | 12 consecutive correct trials no more than 3 corrections                                 |           | final transfer test                        | 59%                              |         |
|                                 |                      |                  |        |                                                                                          |           | single 100 trials session with new stimuli |                                  |         |
| <b>Gierszewski et al., 2013</b> | Cichlids (9)         | Simultaneous MTS | symbol | 2 stimuli presented                                                                      | 350 - 400 | using cross and circle                     | within 400 trials                | fail    |
|                                 |                      |                  |        | 10 trials per session, 2 per day                                                         |           |                                            |                                  |         |
|                                 |                      |                  |        | criterion 3x 70% in a row                                                                |           |                                            |                                  |         |
|                                 |                      |                  |        | 35-40 sessions                                                                           |           |                                            |                                  |         |
| <b>Newport et al., 2014</b>     | Archerfish (7)       | Simultaneous MTS | symbol | As Goldman and Shapiro, 1979                                                             |           | 3 stimuli                                  | 800                              | fail    |
|                                 |                      |                  |        | Pre-training: white light in the middle, white light both side, touch and receive food   |           |                                            |                                  |         |
|                                 |                      |                  |        | Training: 3 stimuli: red, green and blue light                                           |           |                                            |                                  |         |

|                          |                                  |                  |        |                                                                                                                           |         |                                                                                            |           |         |
|--------------------------|----------------------------------|------------------|--------|---------------------------------------------------------------------------------------------------------------------------|---------|--------------------------------------------------------------------------------------------|-----------|---------|
| <b>Bloch et al, 2019</b> | Zebrafish (10-12 per experiment) | Simultaneous MTS | Colour | Colour discrimination as training<br>10 trials per session, 1 per day<br>ITI = 10s<br>criterion: 3x 70% or above in a row | 70 – 80 | Simultaneous MTS as training<br>Same colour stimuli<br>criterion: 3x 70% or above in a row | 120 – 150 | success |
|--------------------------|----------------------------------|------------------|--------|---------------------------------------------------------------------------------------------------------------------------|---------|--------------------------------------------------------------------------------------------|-----------|---------|

1
